# Supplementary material for: Macrocyclic ligand decorated ordered mesoporous silica with large-pore and short-channel characteristics for effective separation of lithium isotopes: synthesis, adsorptive behavior study and DFT modeling
Source: Royal Society of Chemistry journal article supplement (doi:10.1039/c6dt03136f), 2016-01-01
Supplement: c6dt03136f1.pdf [file c6dt03136f1.pdf]

Supporting Information for

**Macrocyclic Ligands Decorated Ordered Mesoporous Silicas with  
Large-Pore and Short-Channel Characteristics for Effective  
Separation of Lithium Isotopes: Synthesis, Adsorptive Behavior  
Study and DFT Modeling**

Yuekun Liu<sup>a,†</sup>, Fei Liu<sup>c,†</sup>, Gang Ye<sup>a,b,\*</sup>, Ning Pu<sup>a</sup>, Fengcheng Wu<sup>a</sup>, Zhe Wang<sup>a</sup>,

Xiaomei Huo<sup>a</sup>, Jian Xu<sup>c</sup> and Jing Chen<sup>a,b,\*</sup>

<sup>a</sup> Collaborative Innovation Center of Advanced Nuclear Energy Technology, Institute of Nuclear and New Energy Technology, Tsinghua University, Beijing 100084, China.

<sup>b</sup> Beijing Key Lab of Radioactive Waste Treatment, Tsinghua University, Beijing, 100084, China.

<sup>c</sup> Faculty of Chemical Science and Engineering, China University of Petroleum, Beijing, 100084, China.

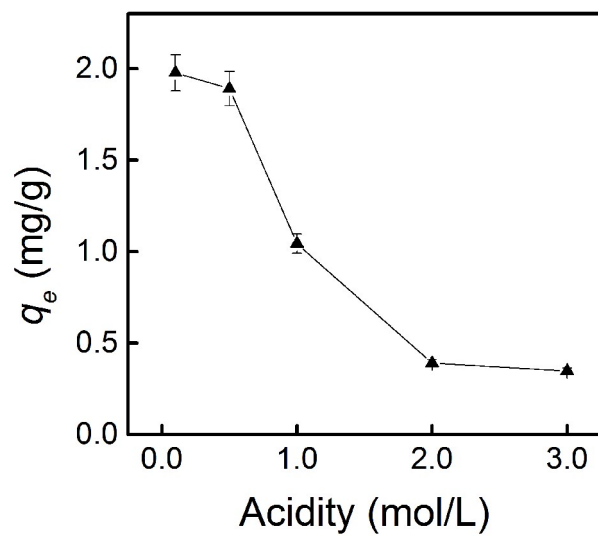

**Figure S1.** Influence of acidity in aqueous phases on the Li(I) adsorption capacity of SBA-NH-B15C5

**Table S1** Kinetic parameters fitted by using different kinetic models.

| Pseudo-second-order model <sup>a</sup> |       |                       | Pseudo-second-order model                           |       |                       |                                                   | Intraparticle diffusion model <sup>b</sup>           |       |               |
|----------------------------------------|-------|-----------------------|-----------------------------------------------------|-------|-----------------------|---------------------------------------------------|------------------------------------------------------|-------|---------------|
| $k_1$<br>(min <sup>-1</sup> )          | $R^2$ | $q_{t,cal}$<br>(mg/g) | $k_2$<br>(g mg <sup>-1</sup><br>min <sup>-1</sup> ) | $R^2$ | $q_{t,cal}$<br>(mg/g) | $h$<br>(mg g <sup>-1</sup><br>min <sup>-1</sup> ) | $k_3$<br>(mg g <sup>-1</sup><br>min <sup>1/2</sup> ) | $R^2$ | $C$<br>(mg/g) |
| 0.039                                  | 0.697 | 0.84                  | 0.096                                               | 0.998 | 2.38                  | 0.54                                              | 0.108                                                | 0.461 | 1.29          |

<sup>a</sup> The pseudo-first-order model is written as  $\log(q_e - q_t) = \log(q_e) - \frac{k_1}{2.303}t$ , where  $q_e$  and  $q_t$  (mg/g) are the adsorption capacity of Li(I) at equilibrium and at time  $t$  (min), respectively,  $k_1$  (min<sup>-1</sup>) is the rate constant.

<sup>b</sup> The intraparticle diffusion model is written as  $q_t = k_3 t^{1/2} + C$ , where  $k_3$  (mg g<sup>-1</sup> min<sup>1/2</sup>) is the rate constant,  $q_t$  (mg/g) is the adsorption capacity of Li(I) at time  $t$  (min), and  $C$  represents the thickness of the boundary layer.

**Table S2.** Enthalpy changes  $\Delta H^0$ , entropy changes  $\Delta S^0$  and Gibbs free energy change  $\Delta G^0$  of the Li(I) adsorption reaction  $\text{Li}_{aq}^+ + nL_s + X_{aq}^- = (\text{Li}^+ nL)X_s^-$ .  $L_s$  represents the SBA-NH-B15C5 OMSs.

| Sample       | Temperature<br>(K) | $\Delta H^0$<br>(kJ/mol) | $\Delta S^0$<br>J/(mol K) | $\Delta G^0$<br>(kJ/mol) |
|--------------|--------------------|--------------------------|---------------------------|--------------------------|
| SBA-NH-B15C5 | 288.15             | -26.2                    | -89.3                     | -0.46                    |
|              | 298.15             |                          |                           | 0.42                     |
|              | 311.15             |                          |                           | 1.59                     |

**Table S3.** Comparison of separation factor of lithium isotopes by the SBA-NH-B15C5 and other sorbents reported in the literature.

| Sorbents                                             | Experimental conditions                         | $\alpha$ | Ref.      |
|------------------------------------------------------|-------------------------------------------------|----------|-----------|
| B15C5 impregnated silica resin                       | T=35 °C, 0.55 M Li(I) in methanol/HCl (V/V=3/7) | 1.013    | 1         |
| B15C5 bonded phenol resin                            | T=35 °C, 0.6 M Li(I) in methanol/HCl (V/V=3/7)  | 1.033    | 2         |
| Azacrown merrifield resin                            | T=25 °C, 1000 ppm Li(I) in DI water             | 1.001    | 3         |
| N <sub>4</sub> O <sub>2</sub> azacrown ion exchanger | T=20 °C, 1000 ppm Li(I) in DI water             | 1.038    | 4         |
| N <sub>4</sub> S <sub>2</sub> azacrown ion exchanger | T=25 °C, 500 ppm Li(I) in DI water              | 1.034    | 5         |
| B15C5 bonded merrifield resin                        | T=20 °C, 485 ppm Li(I) in DI water              | 1.026    | 6         |
| IL17-5SGs & IL17-5IRs                                | T=25 °C, 20 mM Li(I)                            | 1.048    | 7         |
| IL15SGs                                              | Room temperature, 20 mM Li(I)                   | 1.046    | 8         |
| SBA-NH-B15C5                                         | T=15 °C, 2.0 g/L Li(I) in DI water              | 1.049    | This work |

### Supporting references

1. Y. Ban, M. Nomura and Y. Fujii, *J. Nucl. Sci. Technol.*, 2002, **39**, 279-281.
2. K. Otake, T. Suzuki, H. Kim, M. Nomura and Y. Fujii, *J. Nucl. Sci. Technol.*, 2006, **43**, 419-422.
3. D. W. Kim, B. K. Kim, S. R. Park, N. S. Lee, Y. S. Jeon and K. Y. Ô. L. Choi, *J. Radioanal. Nucl. Ch.*, 1998, **232**, 257-259.
4. D. W. Kim, Y. H. Jang, N. S. Lee, Y. S. Chung, K. Y. Kim, S. U. Park and C. S. Kim, *J. Radioanal. Nucl. Ch.*, 1999, **240**, 155-158.
5. D. W. Kim, C. S. Kim, J. S. Jeon, J. S. Kim and N. S. Lee, *J. Radioanal. Nucl. Ch.*, 1999, **241**, 379-382.
6. D. W. Kim, H. J. Kim, J. S. Jeon, K. Y. Choi and Y. S. Jeon, *J. Radioanal. Nucl. Ch.*, 2000, **245**, 571-574.
7. X. Sun, L. Gu, D. Qiu, D. Ren, Z. Gu and Z. Li, *J. Radioanal. Nucl. Ch.*, 2015, **303**, 2271-2282.
8. W. Zhou, X. Sun, L. Gu, F. Bao, X. Xu, C. Pang, Z. Gu and Z. Li, *J. Radioanal. Nucl. Ch.*, 2014, **300**, 843-852.
